# Supplementary material for: Continental-scale bias-corrected climate and hydrological projections for Australia
Source: Copernicus journal article supplement (doi:10.5194/gmd-2023-7), 2023-03-01
Supplement: Supplementary file 1 [file gmd-2023-7-supplement-version1.pdf]

# Supplementary figures for GMD-2023-07

AUS

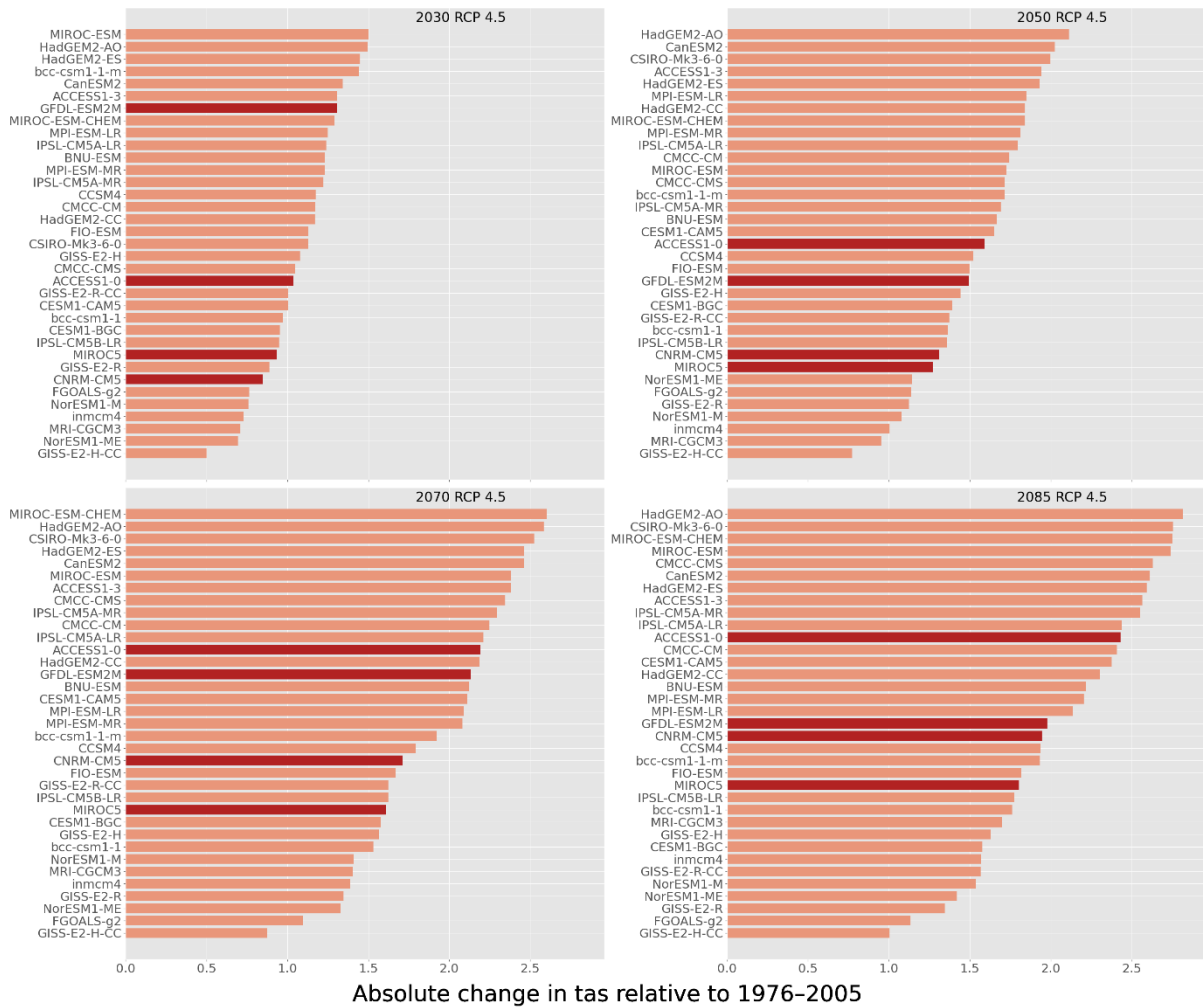

Figure S1: The same as Figure 2 for RCP4.5.

AUS

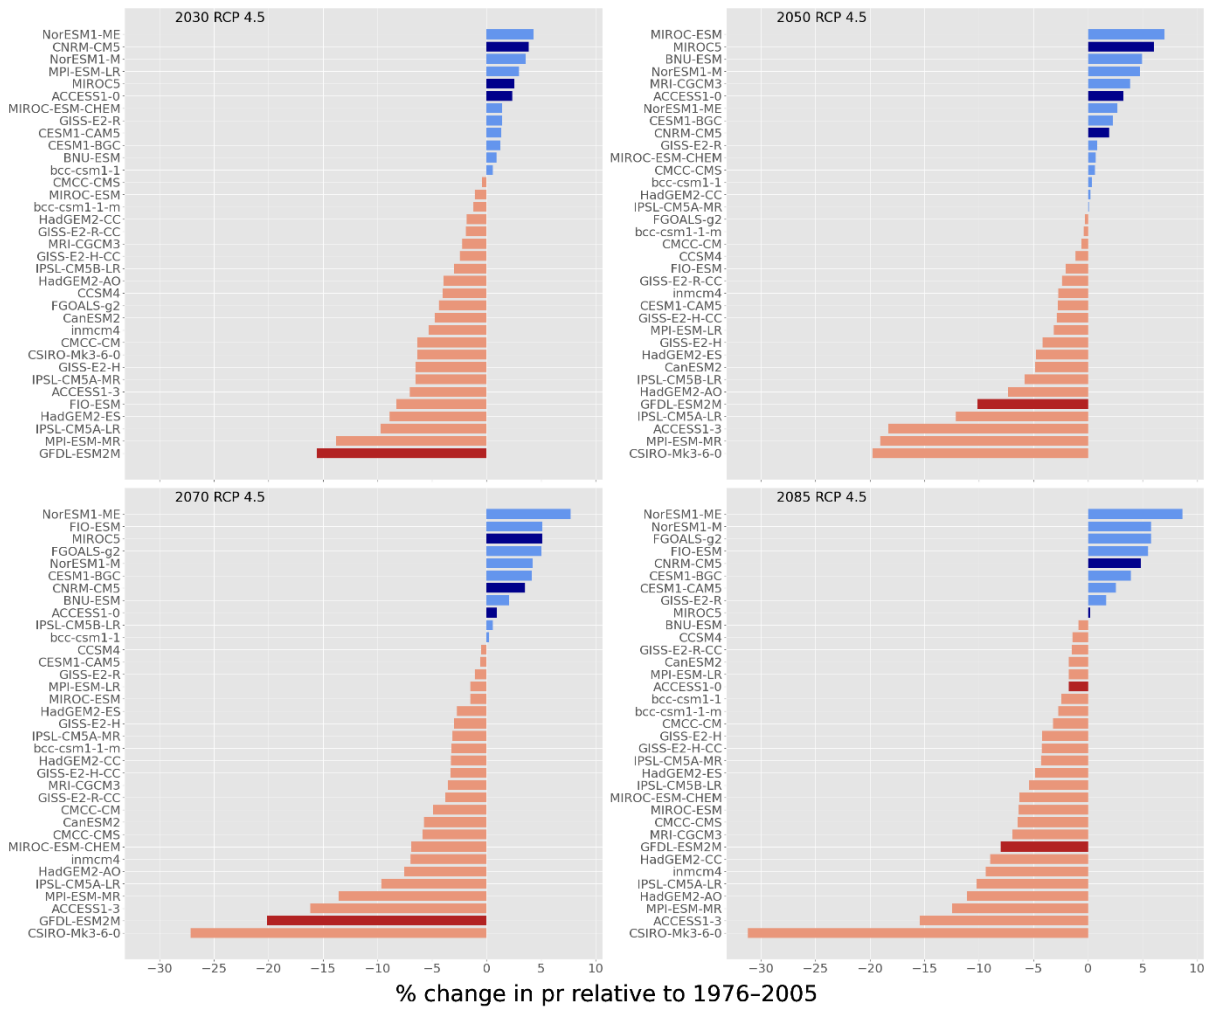

Figure S2: The same as Figure 3 for RCP4.5.

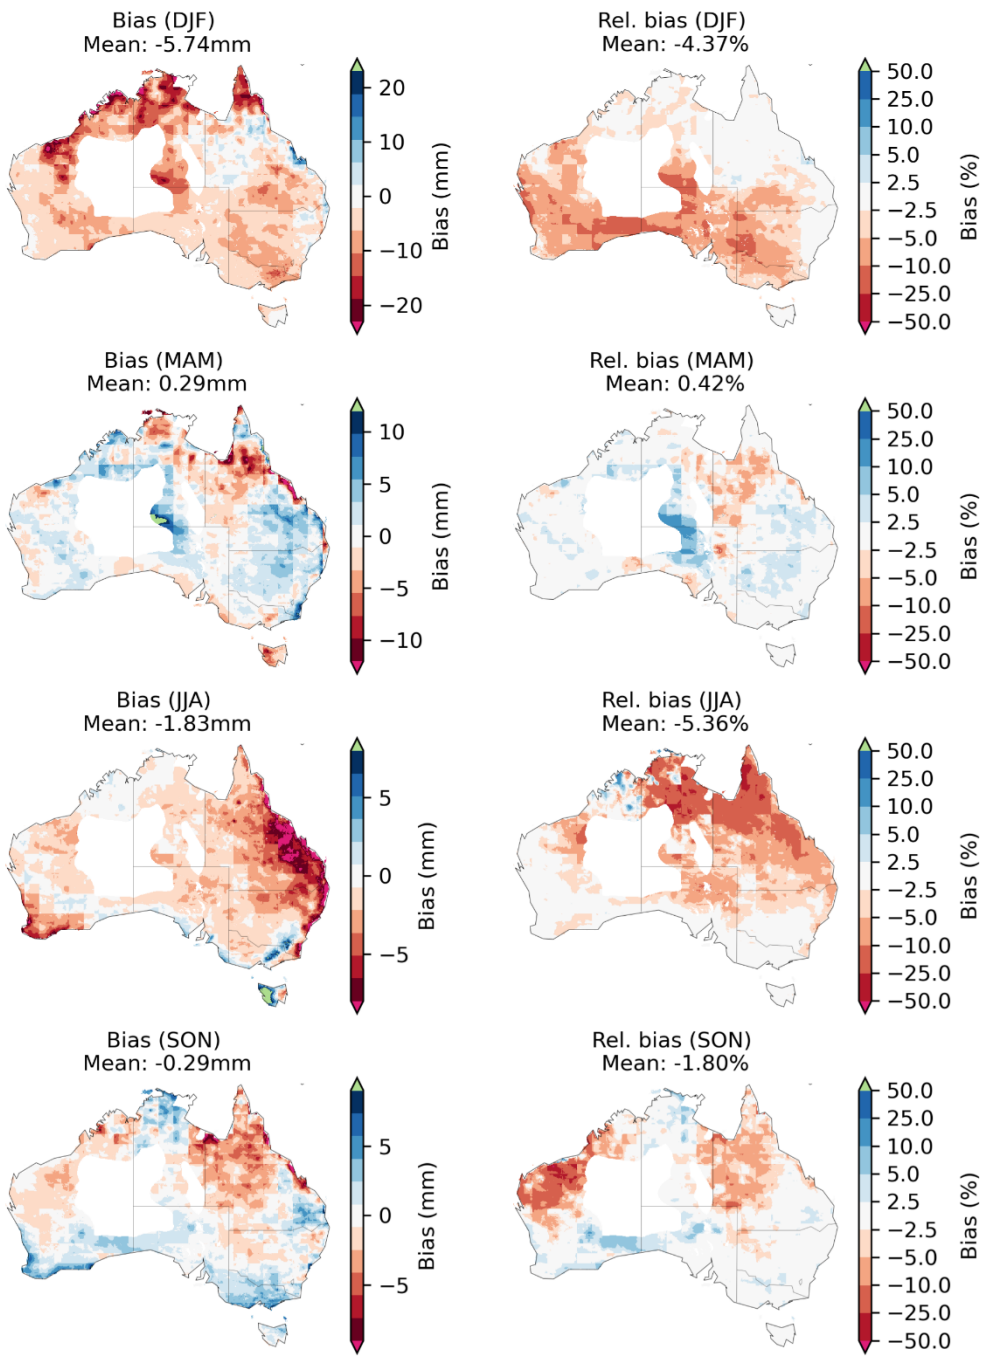

**Figure S3: The same as Figure 8(a) but for seasonal biases of precipitation.**

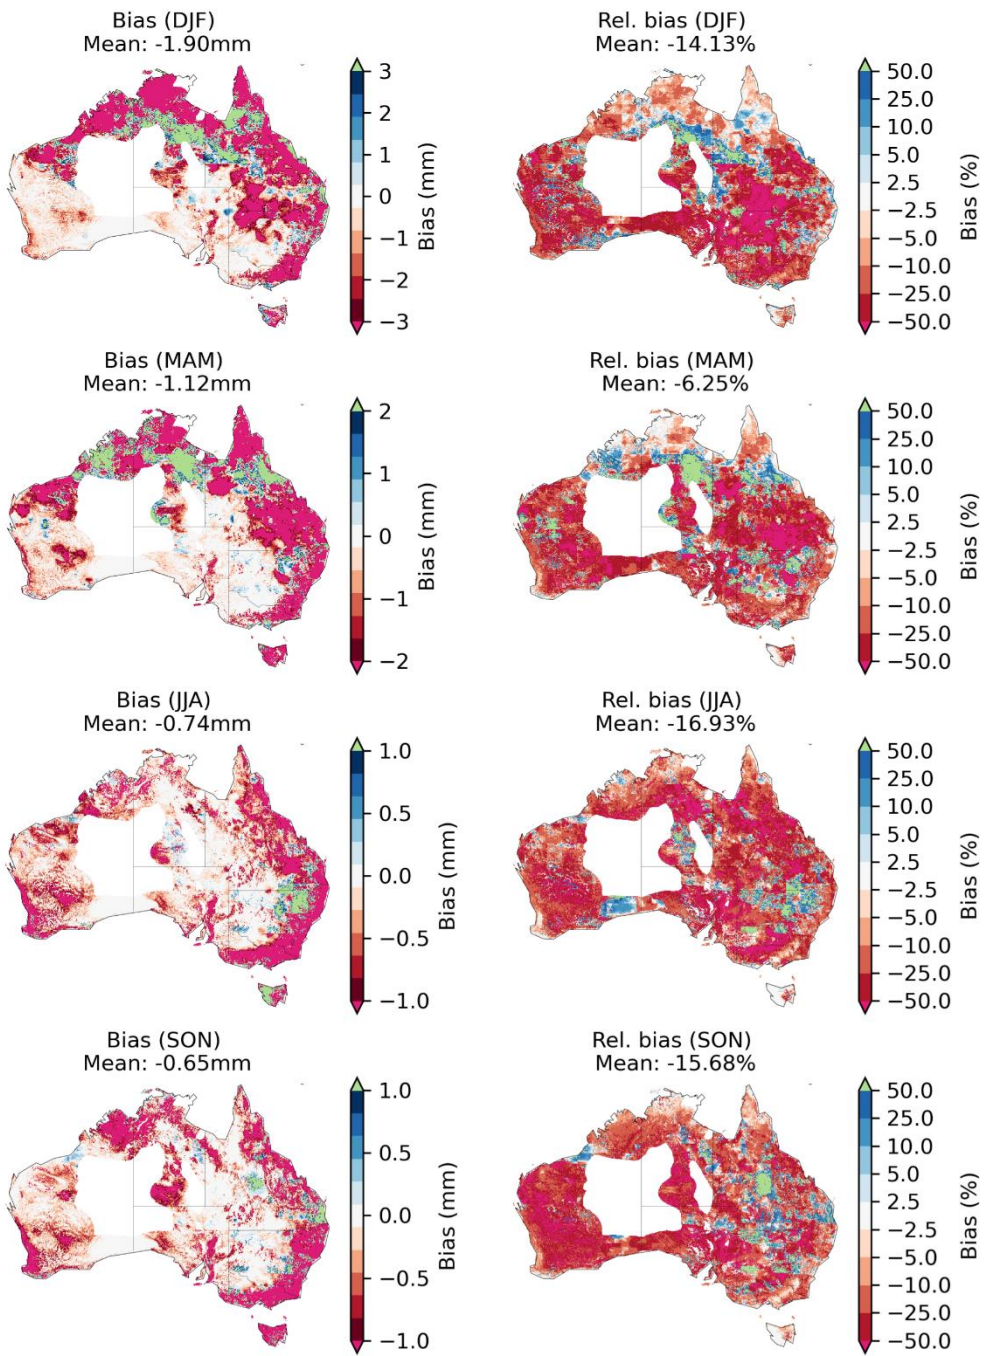

Figure S4: The same as Figure 8(b) but for seasonal values of runoff.

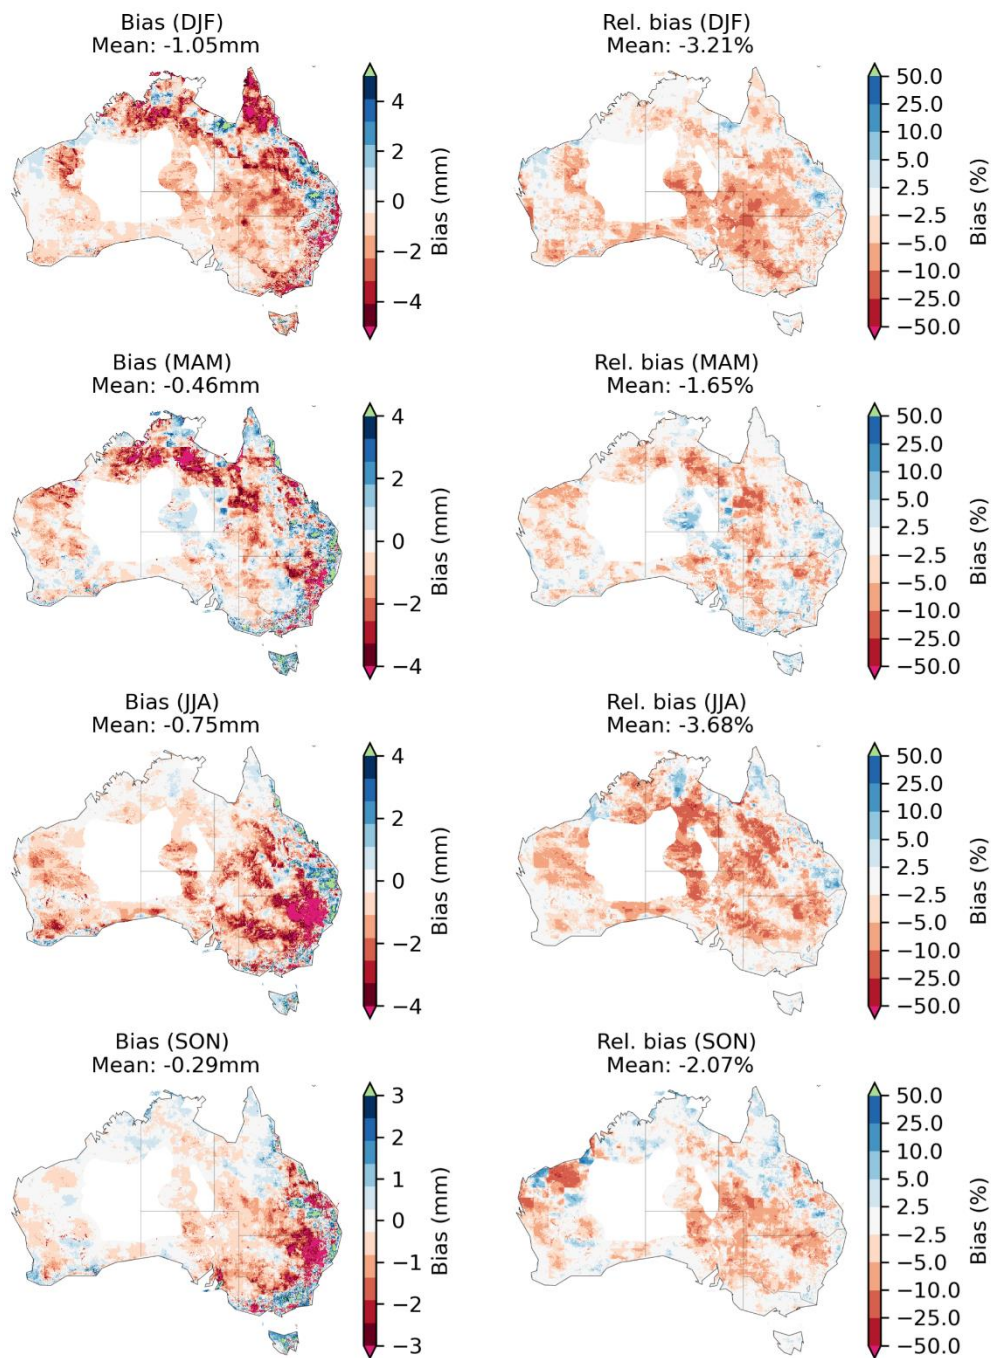

Figure S5: The same as Figure 8(c) but for seasonal values of root-zone soil moisture.

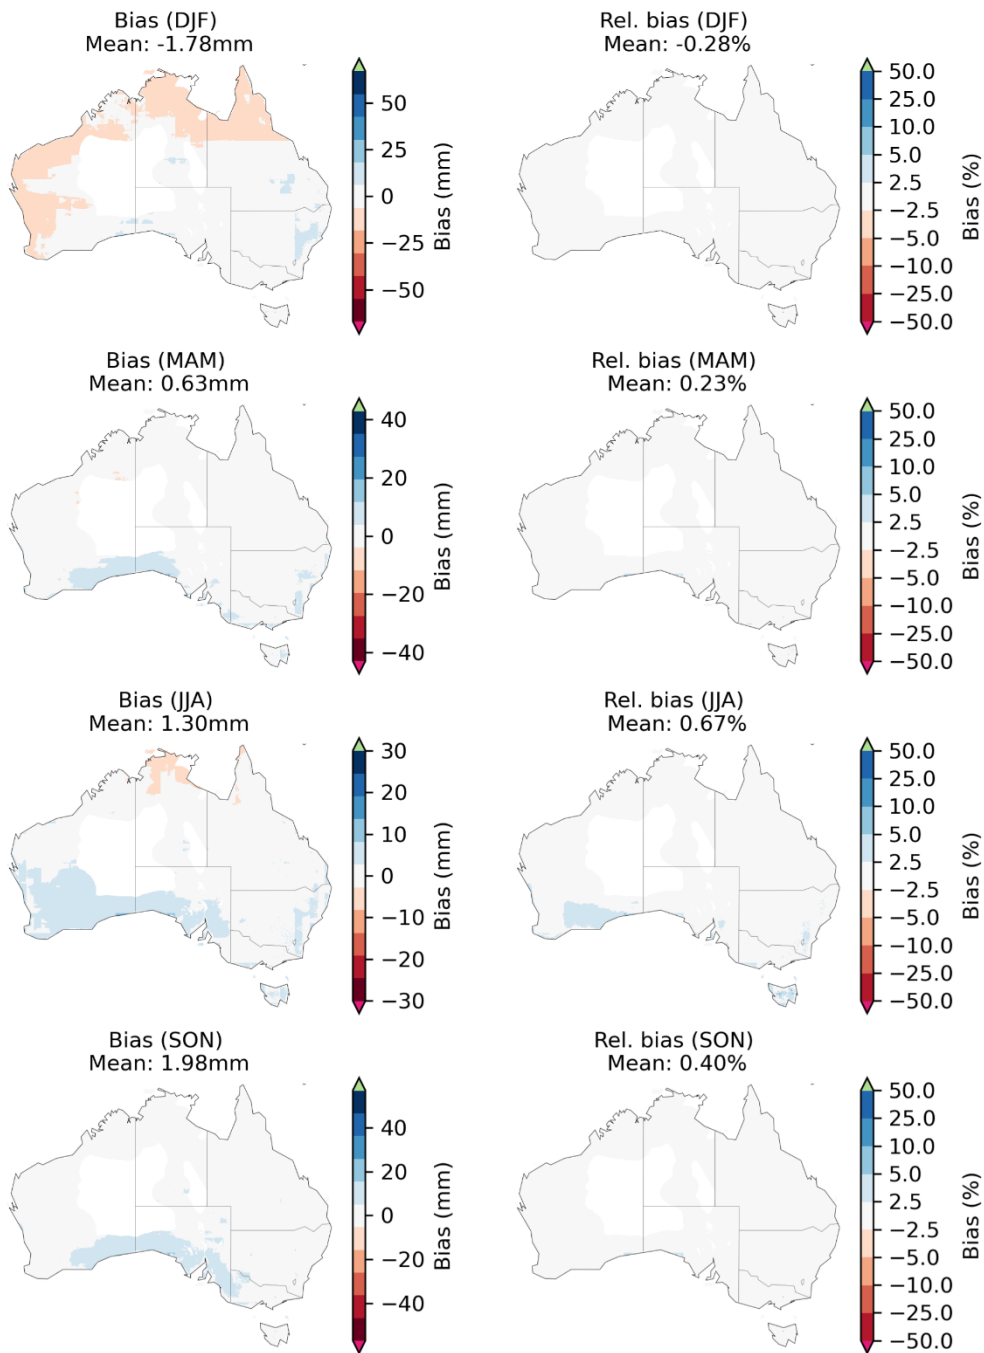

**Figure S6: The same as Figure 8(d) but for seasonal values of potential evapotranspiration.**

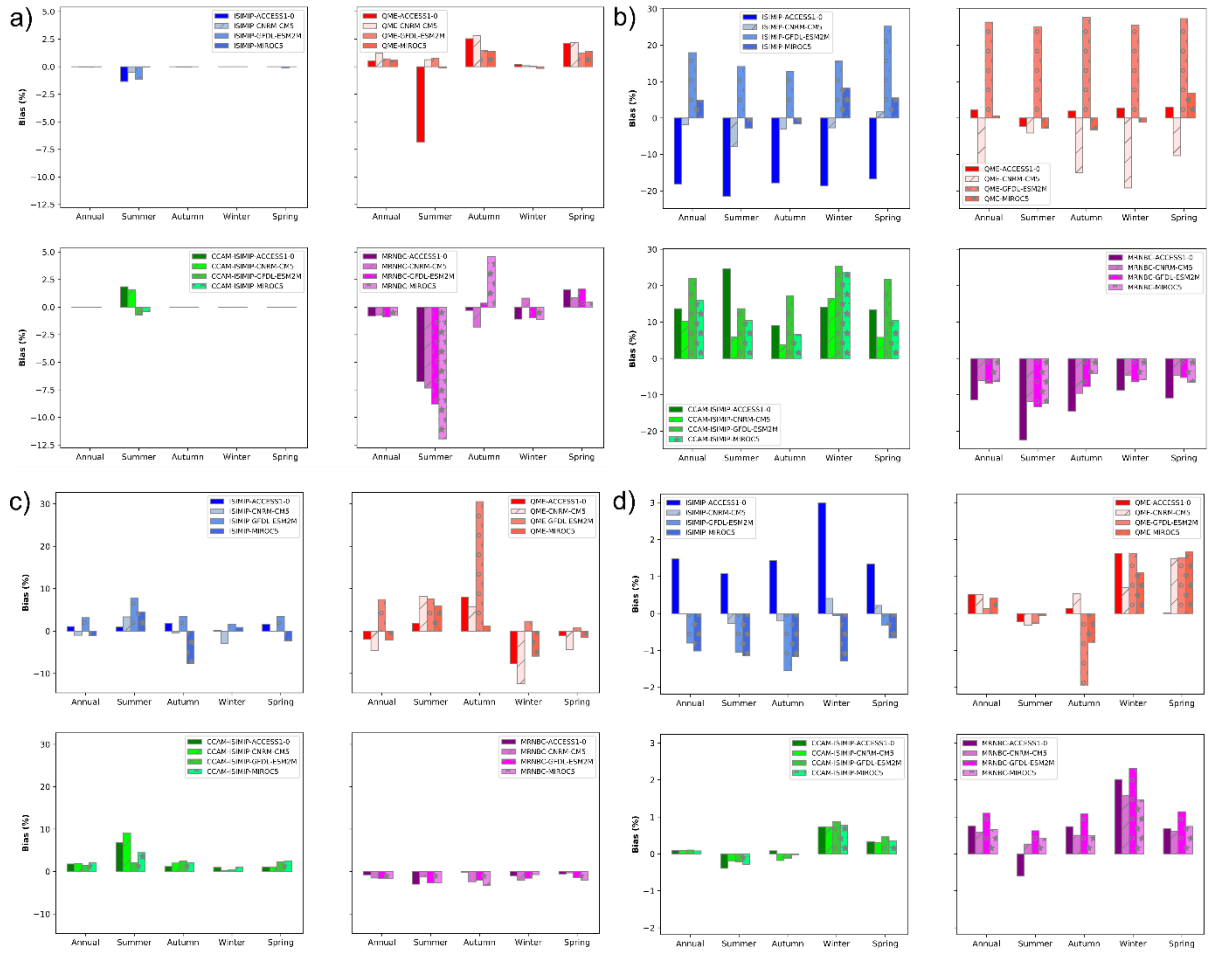

Figure S7: Same as Figure 9, but for the Southern and Southwestern Flatlands (SSWF) NRM region.

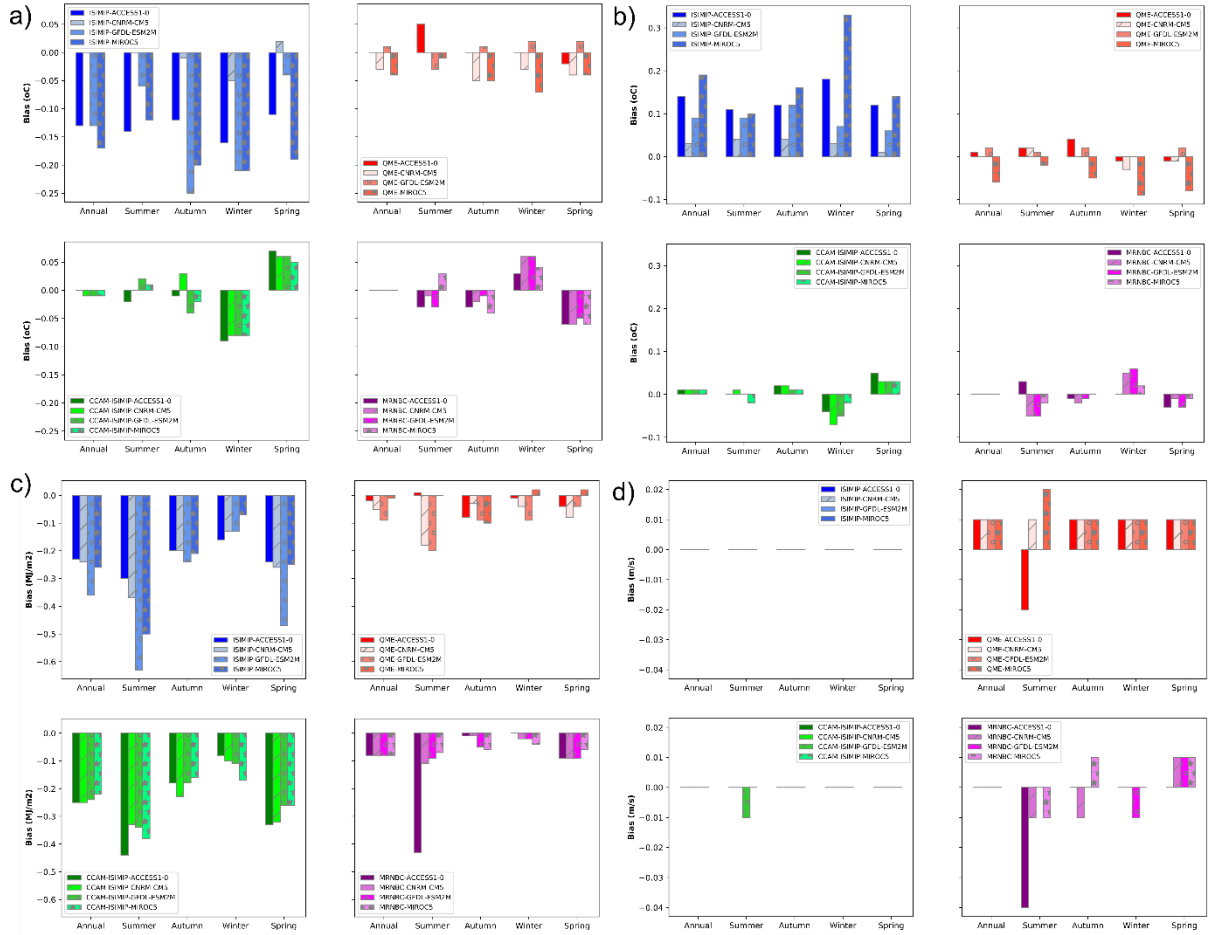

Figure S8: Same as Figure 10, but for the Southern and Southwestern Flatlands (SSWF) NRM region.
