# Supplementary material for: Continental-scale bias-corrected climate and hydrological projections for Australia
Source: Copernicus journal article supplement (doi:10.5194/gmd-2023-7), 2023-03-01

Dear Professor Medlyn,

Thank you for this question. We didn't bias correct a humidity variable because it was not needed by the hydrological model (AWRA-L v6) that was used for the NHP.

- 5 We investigated calculating vapour pressure using the assumption that the dewpoint is tasmin and calculating vapour pressure using the FAO56 PM equation.

The results are displayed below. It is a bit hard to read the scale but the percentage difference plot ranges from -18 to 70 percent. This indicates that the assumption of using tasmin as the dewpoint is unrealistic (as expected).

- 10 Unfortunately, this means that you would need to apply your own bias correction to vapour pressure independently before using the NHP output for your vegetation modelling.

As part of the Australian Climate Service (ACS – see <https://www.acs.gov.au/>), we will be undertaking bias correction of vapour pressure using CMIP6 data. Hopefully that data will useable for applications such as yours.

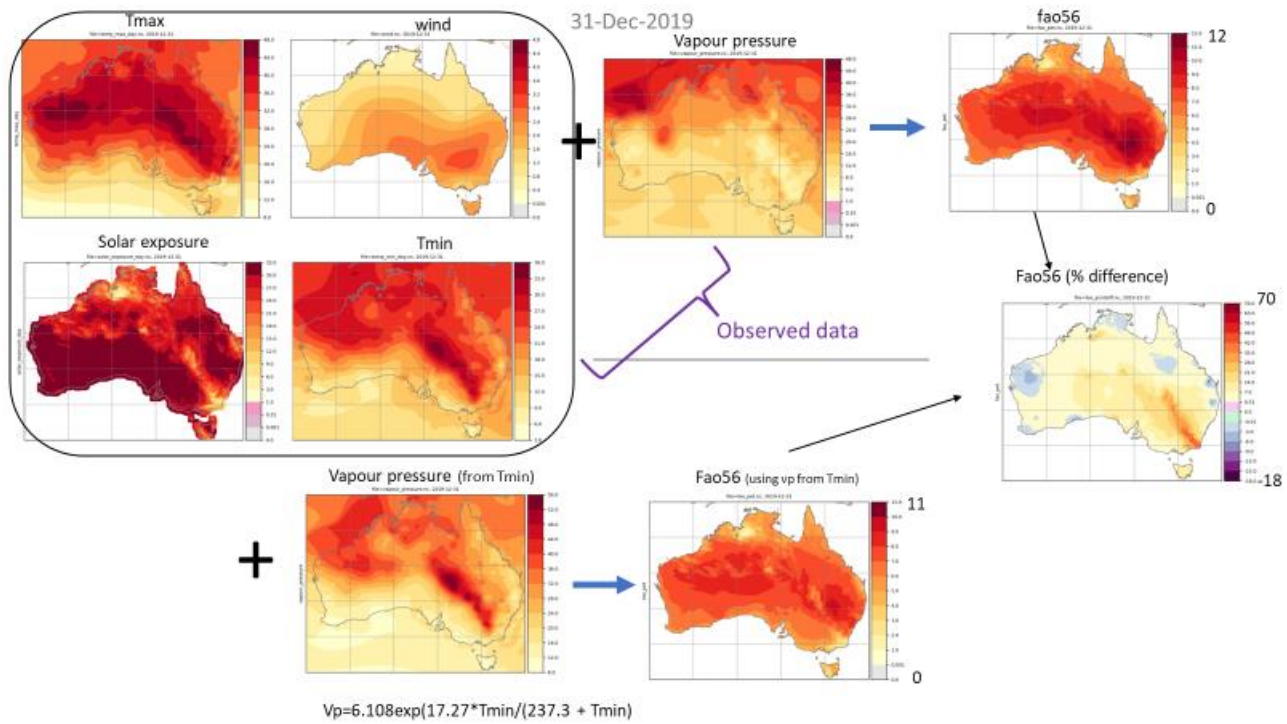

Supplement: Supplementary file [file gmd-2023-7-AC6-supplement.pdf]
